# Supplementary material
Source: publisher figshare collection journal article supplement (https://acs.figshare.com/ndownloader/files/6646590)
Supplement: Supplementary file 1 [file 6646590]

# Targeted metabolic profiling of the Tg197 mouse model reveals itaconic acid as a marker of Rheumatoid Arthritis.

Filippos Michopoulos<sup>1,2</sup>, Niki Karagianni<sup>3</sup>, Nichola Whalley<sup>1</sup>, Mike Firth<sup>8</sup>, Christoforos Nikolaou<sup>5,6</sup>, Ian D Wilson<sup>4</sup>, Susan E Critchlow<sup>1</sup>, Georgios Kollias<sup>5,7\*</sup>, Georgios Theodoridis<sup>2\*</sup>

<sup>1</sup>Bioscience, Oncology iMED, AstraZeneca, Alderley Park, Macclesfield, Cheshire, UK

<sup>2</sup>Department of Chemistry, Aristotle University of Thessaloniki, 541 24 Greece.

<sup>3</sup>Biomedcode Hellas SA, 34 Fleming Str., 16672 Vari, Greece

<sup>4</sup>Department of Surgery and Cancer, Imperial College, London UK.

<sup>5</sup>BSRC Al. Fleming, 34 Fleming Str., 16672 Vari, Greece

<sup>6</sup>Department of Biology, University of Crete, Heraklion, Greece

<sup>7</sup>Department of Physiology, Faculty of Medicine, National and Kapodistrian University of Athens, Greece

<sup>8</sup>Discovery Science, Innovative Medicine, AstraZeneca, Cambridge, UK

\*Author for correspondence

Email: [gtheodor@chem.auth.gr](mailto:gtheodor@chem.auth.gr), [kollias@fleming.gr](mailto:kollias@fleming.gr)

[Tel:+302310997718](tel:+302310997718) +302109656507

Fax: :+302310997719 +302109656563

**Table S1:** Table S1: List of animals per group

**Table S2:** Metabolite list profiled at all biospecimens with the targeted LC-MS platform

**Figure S1:** (A) Mouse body weight trajectory and (B) arthritic score across 6 weeks of *in vivo* study.

**Figure S2:** Itaconic acid median peak area distribution at serum and urine samples collected at week 6 and 11 of age.

**Figure S3:** Detailed representation of citrate to α-ketoglutarate metabolism with associated enzyme located in the cytoplasm and mitochondrion.

## Supplementary Tables

**Table S2:** List of animals per group.

| <b>Group</b> | <b>Urine (Study 1)</b> | <b>Serum (Study 1)</b> | <b>SF (study 2)</b> | <b>Urine (Study 3)</b> | <b>Serum (Study3)</b> |
|--------------|------------------------|------------------------|---------------------|------------------------|-----------------------|
|              | <b>Week6</b>           | <b>Week6</b>           | <b>Week 6</b>       | <b>Week 6</b>          | <b>Week 6</b>         |
| Male Tg197   | 7                      | 7                      | 7                   | 6                      | 6                     |
| Female Tg197 |                        |                        | 7                   | 6                      | 5                     |
| Male WT      | 7                      | 7                      | 7                   | 6                      | 6                     |
| Female WT    |                        |                        | 8                   | 6                      | 6                     |
|              | <b>Weeks 7-11*</b>     | <b>Week11</b>          | <b>Week11</b>       | <b>Week 11</b>         | <b>Week 11</b>        |
| Male Tg197   | 7                      | 7                      | 5                   | 3                      | 5                     |
| Female Tg197 |                        |                        |                     | 4                      | 3                     |
| Male WT      | 7                      | 7                      | 5                   | 5                      | 5                     |
| Female WT    |                        |                        |                     | 3                      | 5                     |
| Male Tr      | 7                      | 7                      | 5                   | 6                      | 6                     |
| Female Tr    |                        |                        |                     | 4                      | 5                     |

\* urine collection performed on weekly basis

**Table S2:** Metabolites profiled in all biospecimens with the targeted LC-MS platform

| Number | ID                | Metabolite Name                                            |
|--------|-------------------|------------------------------------------------------------|
| 1      | AcetylCoA         | Acetyl coenzymeA                                           |
| 2      | Adenine           | Adenine                                                    |
| 3      | Adipic acid       | Adipic acid                                                |
| 4      | ADP               | Adenosine diphosphate                                      |
| 5      | ADP ribose        | Adenosine diphosphate ribose                               |
| 6      | $\alpha$ KET      | $\alpha$ -ketoglutaric acid                                |
| 7      | AMP dGMP          | Adenosine monophosphate or 2'-deoxyguanosine monophosphate |
| 8      | Arginine          | Arginine                                                   |
| 9      | Asparagine        | Asparagine                                                 |
| 10     | Aspartic acid     | Aspartic acid                                              |
| 11     | ATP               | Adenosine triphosphate                                     |
| 12     | Benzoic acid      | Benzoic acid                                               |
| 13     | cAMP              | Adenosine-3'5'- cyclic monophosphate                       |
| 14     | cGMP              | Guanosine-3'5'-cyclic monophosphate                        |
| 15     | cis aconitic acid | <i>cis</i> Aconitic acid                                   |
| 16     | Citrate           | Citric acid                                                |
| 17     | Citrulline        | Citrulline                                                 |
| 18     | CMP               | Cytidine monophosphate                                     |
| 19     | Coumaric acid     | Coumaric acid                                              |
| 20     | Creatine          | Creatine                                                   |
| 21     | Creatinine        | Creatinine                                                 |
| 22     | Cystine           | Cystine                                                    |
| 23     | Cytosine          | Cytosine                                                   |
| 24     | dADP              | 2'-deoxyadenosine diphosphate                              |
| 25     | dAMP              | 2'-deoxyadenosine monophosphate                            |
| 26     | dATP              | 2'-deoxyadenosine triphosphate                             |
| 27     | dCDP              | 2'-deoxycytidine diphosphate                               |
| 28     | dCMP              | 2'-deoxycytidine monophosphate                             |

| Number | ID                    | Metabolite Name               |
|--------|-----------------------|-------------------------------|
| 29     | dCTP                  | 2'-deoxycytidine triphosphate |
| 30     | dinitrosalicylic acid | Dinitrosalicylic acid         |
| 31     | FAD                   | Flavin-adenine-dinucleotide   |
| 32     | FBP                   | Fructose 1,6 bisphosphate     |
| 33     | Ferrulic acid         | Ferrulic acid                 |
| 34     | Folate                | Folic acid                    |
| 35     | Fructose 1 P          | Fructose 1 P                  |
| 36     | Fructose 6 P          | Fructose 6 P                  |
| 37     | Fumaric acid          | Fumaric acid                  |
| 38     | G3P                   | Glycerate 3 phosphate         |
| 39     | GAP                   | Glyceraldehyde-3-phosphate    |
| 40     | GBP                   | Glycerate 1,3 bisphosphate    |
| 41     | GDP                   | Guanosine diphosphate         |
| 42     | Glucosamine6P         | Glucosamine 6 phosphate       |
| 43     | Glucose 1 P           | Glucose 1 P                   |
| 44     | Glucose 6 P           | Glucose 6 P                   |
| 45     | Glucuronic acid       | Glucuronic acid               |
| 46     | Glutamate             | Glutamic acid                 |
| 47     | Glutamine             | Glutamine                     |
| 48     | Glutaric acid         | Glutaric acid                 |
| 49     | Glutathione ox        | Glutathione oxidised          |
| 50     | Glutathione red       | Glutathione reduced           |
| 51     | Glyoxylic acid        | Glyoxylic acid                |
| 52     | GMP                   | Guanosine monophosphate       |
| 53     | GTP                   | Guanosine triphosphate        |
| 54     | Guanine               | Guanine                       |
| 55     | Guanosine             | Guanosine                     |
| 56     | Histidine             | Histidine                     |
| 57     | HPPA                  | Hydroxyphenyl propionic acid  |
| 58     | ICA                   | Indole-2-carboxylic acid      |

| Number | ID                 | Metabolite Name                                     |
|--------|--------------------|-----------------------------------------------------|
| 59     | IMP                | Inosine monophosphate                               |
| 60     | inosine            | Inosine                                             |
| 61     | Isocitrate         | Isocitric acid                                      |
| 62     | Isoleucine         | Isoleucine                                          |
| 63     | Itaconic acid      | Itaconic acid                                       |
| 64     | Lactate            | Lactic acid                                         |
| 65     | Leucine            | Leucine                                             |
| 66     | Maleic acid        | Maleic acid                                         |
| 67     | Malic acid         | Malic acid                                          |
| 68     | Malonic acid       | Malonic acid                                        |
| 69     | Malonyl CoA        | Malonyl coenzymeA                                   |
| 70     | Mannose 6 P        | Mannose 6 P                                         |
| 71     | Methionine         | Methionine                                          |
| 72     | Methyl_Malonyl_CoA | Methyl malonyl coenzymeA                            |
| 73     | Methylxanthine     | Methylxanthine                                      |
| 74     | NAD                | Nicotinamide Adenine Dinucleotide                   |
| 75     | NADH               | Nicotinamide Adenine Dinucleotide reduced           |
| 76     | NADP               | Nicotinamide Adenine Dinucleotide Phosphate         |
| 77     | NADPH              | Nicotinamide Adenine Dinucleotide Phosphate reduced |
| 78     | NAG                | N-acetylglucosamine                                 |
| 79     | Nicotinic acid     | Nicotinic acid                                      |
| 80     | Nitrophenol        | Nitrophenol                                         |
| 81     | Orotic acid        | Orotic acid                                         |
| 82     | Pantothenic acid   | Pantothenic acid                                    |
| 83     | Pcreatine          | Phosphocreatine                                     |
| 84     | PEP                | Phosphoenol pyruvic acid                            |
| 85     | PG                 | 6-phosphogluconic acid                              |
| 86     | phenylalanine      | Phenylalanine                                       |
| 87     | Phthalic acid      | Phthalic acid                                       |
| 88     | Proline            | Proline                                             |

| Number | ID                | Metabolite Name                     |
|--------|-------------------|-------------------------------------|
| 89     | Pserine           | Phosphoserine                       |
| 90     | Pyruvate          | Pyruvic acid                        |
| 91     | R5P               | Ribose 5 phosphate                  |
| 92     | riboflavin        | Riboflavin                          |
| 93     | Salicylic acid    | Salicylic acid                      |
| 94     | Serine            | Serine                              |
| 95     | Shikimic acid     | Shikimic acid                       |
| 96     | sorbitol mannitol | sorbitol mannitol                   |
| 97     | Succinate         | Succinic acid                       |
| 98     | Threonine         | Threonine                           |
| 99     | Thymine           | Thymine                             |
| 100    | TIA               | 2-trans-3-indolepyruvic acid        |
| 101    | Tryptophan        | Tryptophan                          |
| 102    | Tyrosine          | Tyrosine                            |
| 103    | UDP               | Uridine diphosphate                 |
| 104    | UDP glucA         | Uridine diphosphate glucuronic acid |
| 105    | UDP glucose       | Uridine diphosphate glucose         |
| 106    | UMP               | Uridine monophosphate               |
| 107    | Uracil            | Uracil                              |
| 108    | Uridine           | Uridine                             |
| 109    | Valine            | Valine                              |

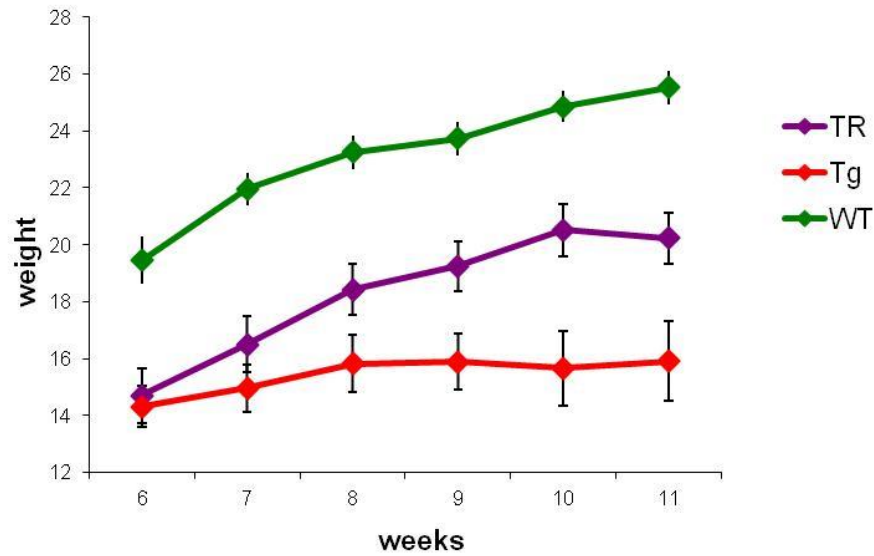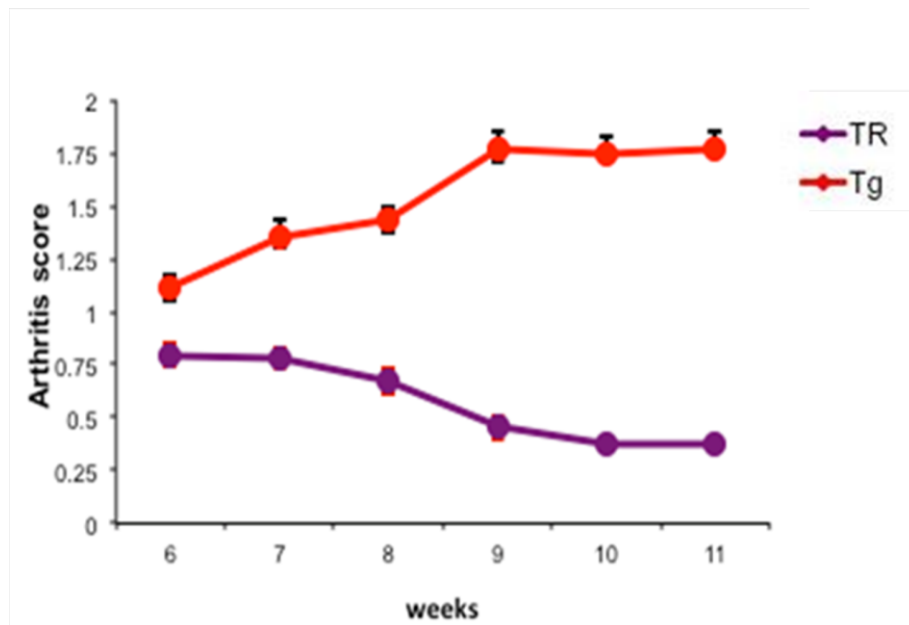

**Figure S1:** (A) Mouse body weight trajectory and (B) arthritic score across 6 weeks of *in vivo* study. Healthy control (WT), diseased (TG) and treated with 10mg/Kg Infliximab animals (TR). Vertical lines represent the body weight variability across a number of animals per groups across the course of the *in vivo* study starting at week 6 up to week 11 of the mouse age.

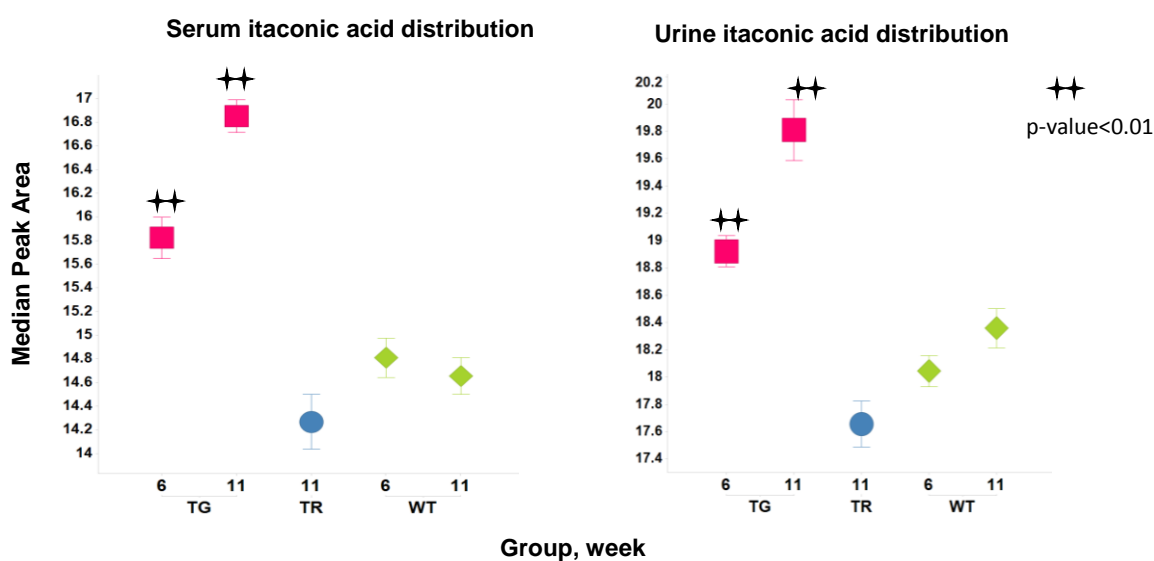

**Figure S2:** Itaconic acid median peak area distribution in serum and urine samples collected at week 6 and 11 of age. Vertical lines describe the standard error of the ion distribution at each group. \*\* p-values < 0.01 as calculated per group comparison to animals of the corresponding age from the healthy control group.

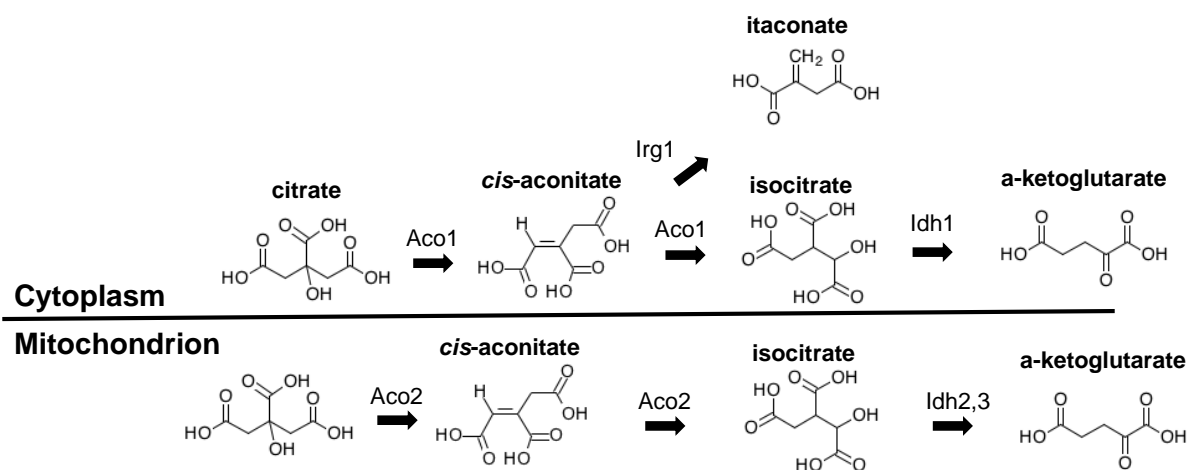

**Figure S3:** Detailed representation of citrate to a-ketoglutarate metabolism with associated enzymes located in the cytoplasm and mitochondrion.
